CORRECTION

# Correction: Clinical and inflammatory characteristics of Asthma-COPD overlap in workers with occupational asthma

Iñigo Ojanguren, Gregory Moulec, Jad Hobeika, Marc Miravittles, Catherine Lemiere

Fig 1 and Fig 2 are based on an earlier version of the results. Please view the corrected Fig 1 and Fig 2 here.

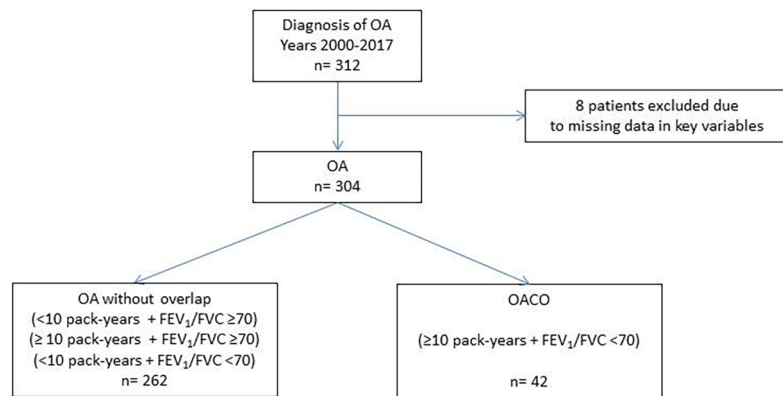

**Fig 1. Study population.** OA: occupational asthma; OACO: occupational asthma COPD overlap; FEV1: forced expiratory volume in the first second; FVC: forced vital capacity.

<https://doi.org/10.1371/journal.pone.0195648.g001>

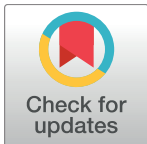

OPEN ACCESS

**Citation:** Ojanguren I, Moulec G, Hobeika J, Miravittles M, Lemiere C (2018) Correction: Clinical and inflammatory characteristics of Asthma-COPD overlap in workers with occupational asthma. PLoS ONE 13(4): e0195648. <https://doi.org/10.1371/journal.pone.0195648>

**Published:** April 4, 2018

**Copyright:** © 2018 Ojanguren et al. This is an open access article distributed under the terms of the [Creative Commons Attribution License](https://creativecommons.org/licenses/by/4.0/), which permits unrestricted use, distribution, and reproduction in any medium, provided the original author and source are credited.

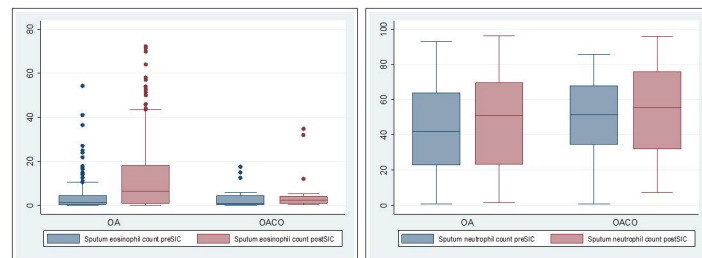

**Fig 2. Sputum eosinophil and neutrophil counts before and after SIC in OA and OACO patients.** OA: occupational asthma; OACO: occupational asthma COPD overlap; SIC: specific inhalation challenge.

<https://doi.org/10.1371/journal.pone.0195648.g002>

Reference

- Ojanguren I, Moulec G, Hobeika J, Miravittles M, Lemiere C (2018) Clinical and inflammatory characteristics of Asthma-COPD overlap in workers with occupational asthma. PLoS ONE 13(3): e0193144. <https://doi.org/10.1371/journal.pone.0193144> PMID: 29499062
